# Supplementary material for: Cardiovascular Profile of Xanthone-Based 1,4 Dihydropyridines Bearing a Lidoflazine Pharmacophore Fragment
Source: PubMed Central journal article supplement (PMC6321116; doi:10.3390/molecules23123088), 2018-11-27
Supplement: molecules-23-03088-s001.pdf [file molecules-23-03088-s001.pdf]

## **Supplementary Materials**

### **Cardiovascular profile of xanthone-based 1,4 dihydropyridines bearing a lidoflazine pharmacophore fragment**

Alessandra Bisi\*, Matteo Micucci, Silvia Gobbi, Federica Belluti, Roberta Budriesi, Angela Rampa.

*Department of Pharmacy and Biotechnology, Alma Mater Studiorum University of Bologna, Via Belmeloro, 6, 40126 Bologna, Italy*

**Table S1.** Activity of Tested Compounds on K<sup>+</sup>-depolarized Guinea Pig Vascular Smooth Muscle.

| Cpd                   | Aorta                              |                                       |                                      |
|-----------------------|------------------------------------|---------------------------------------|--------------------------------------|
|                       | Activity <sup>d</sup><br>(m ± SEM) | IC <sub>50</sub> <sup>e</sup><br>(μM) | 95% conf lim<br>(x10 <sup>-6</sup> ) |
| Nif.                  | 82 ± 1.3 <sup>f</sup>              | 0.009                                 | 0.003–0.02                           |
| Lidofl                | 42 ± 1.7 <sup>g</sup>              |                                       |                                      |
| <b>1<sup>a</sup></b>  | <b>59 ± 4.9<sup>g</sup></b>        | 0.76                                  | 0.69–0.85                            |
| <b>2<sup>a</sup></b>  | <b>7 ± 0.2</b>                     |                                       |                                      |
| <b>3a<sup>b</sup></b> | <b>51 ± 2.2</b>                    | <b>2.18</b>                           | <b>1.88–2.36</b>                     |
| <b>4a</b>             | <b>16 ± 0.7</b>                    |                                       |                                      |
| <b>5a</b>             | <b>20 ± 0.3</b>                    |                                       |                                      |
| <b>3b<sup>b</sup></b> | <b>55 ± 1.6</b>                    | <b>1.04</b>                           | <b>0.78–1.37</b>                     |
| <b>4b</b>             | <b>21 ± 1.3</b>                    |                                       |                                      |
| <b>5b</b>             | <b>48 ± 2.1</b>                    |                                       |                                      |
| <b>3c<sup>c</sup></b> | <b>44 ± 3.4</b>                    |                                       |                                      |
| <b>4c</b>             | <b>6 ± 0.3</b>                     |                                       |                                      |
| <b>5c</b>             | <b>25 ± 2.0</b>                    |                                       |                                      |
| <b>3d<sup>c</sup></b> | <b>31 ± 2.8</b>                    |                                       |                                      |
| <b>4d</b>             | <b>9 ± 0.9</b>                     |                                       |                                      |
| <b>5d</b>             | <b>36 ± 2.3</b>                    |                                       |                                      |
| <b>3e<sup>c</sup></b> | <b>33 ± 2.5</b>                    |                                       |                                      |
| <b>4e</b>             | <b>9 ± 0.3</b>                     |                                       |                                      |
| <b>5e</b>             | <b>6 ± 0.2</b>                     |                                       |                                      |

<sup>a</sup>Taken from ref 1. <sup>b</sup>Taken from ref 2. <sup>c</sup>Taken from ref 3. <sup>d</sup>Percent inhibition of calcium-induced contraction on K<sup>+</sup>-depolarized (80 mM) guinea pig vascular smooth muscle (aortic strips) at 5x10<sup>-5</sup> M. For compounds that reach the maximum intrinsic activity at concentrations different from those indicated in “d” the maximum active concentration is indicated with a specific superscribed letter. <sup>e</sup>Calculated from log concentration-response curves (Probit analysis by Litchfield and Wilcoxon [20])

with  $n = 6-7$ ). When the maximum effect was  $<50\%$ , the  $IC_{50}$  values were not calculated. <sup>f</sup>At  $10^{-6}$  M. <sup>g</sup>At  $10^{-5}$  M. Bold: unpublished data. Conf lim: confidential limit.

**Figure S1.**  $^1H$  NMR spectra of new compounds.

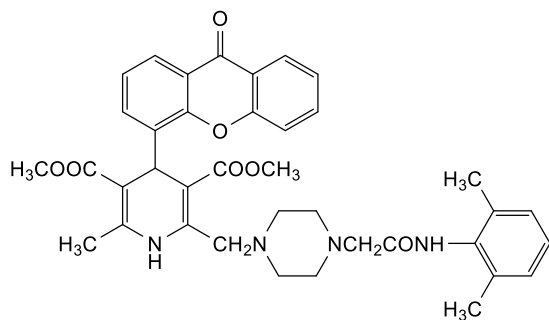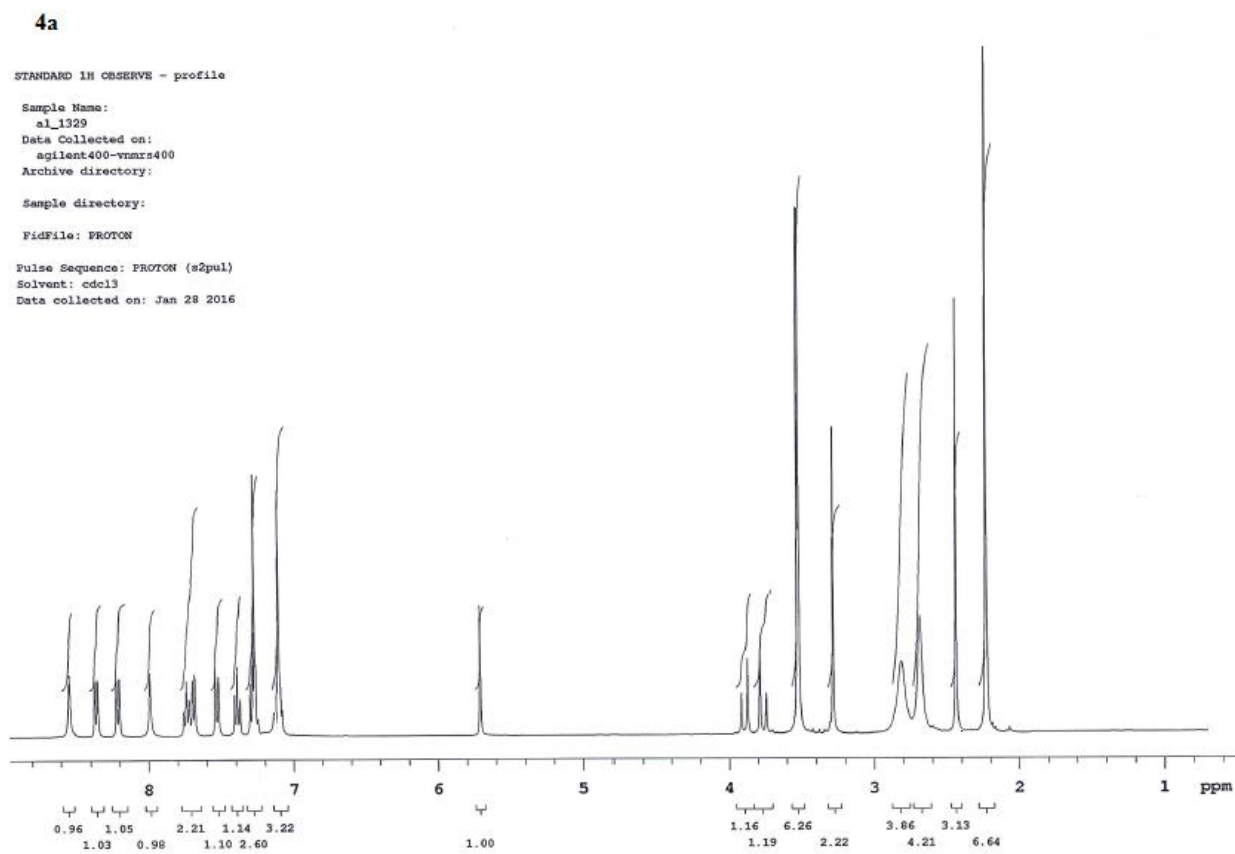

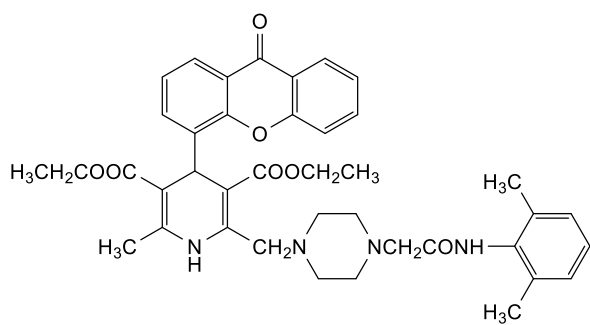

### 4b

STANDARD 1H OBSERVE - profile  
 Selective band center: 7.58 (ppm); width: 47.0 (Hz)

Sample Name:  
 ep\_1309  
 Data Collected on:  
 agilent400-vnmrs400  
 Archive directory:

Sample directory:

FidFile: PROTON

Pulse Sequence: PROTON (s2pul)  
 Solvent: cdcl3  
 Data collected on: Nov 14 2018

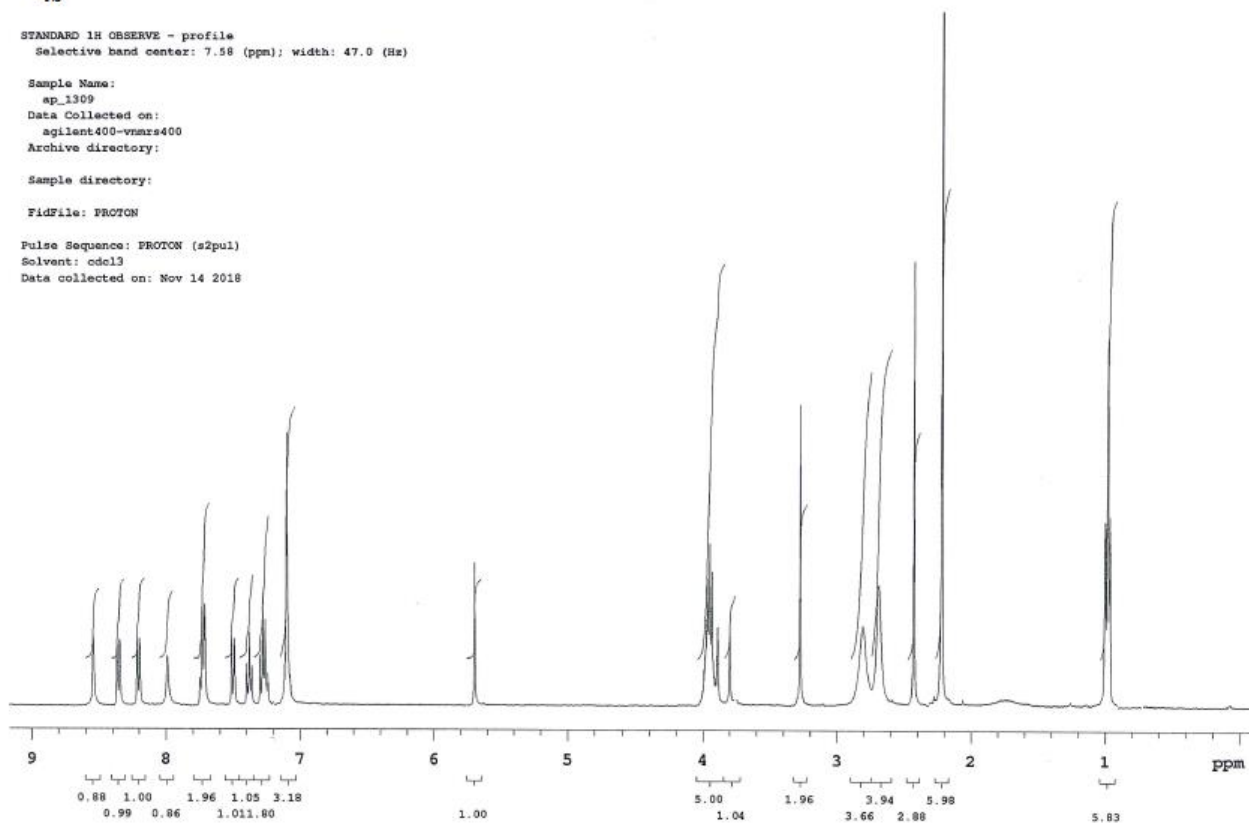

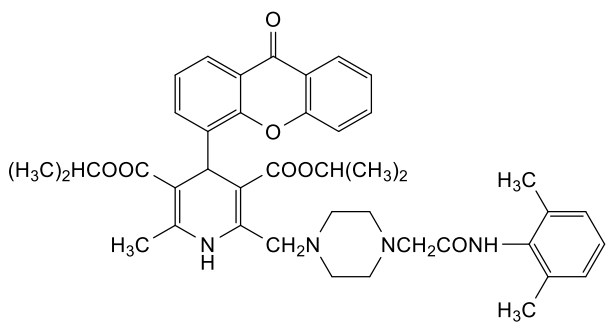

#### 4c

STANDARD 1H OBSERVE - profile

Sample Name: 131d  
 Data Collected on: agilent400-vnmr400  
 Archive directory:  
 Sample directory:  
 FidFile: PROTON  
 Pulse Sequence: PROTON (s2pul)  
 Solvent: cdcl3  
 Data collected on: Nov 13 2018

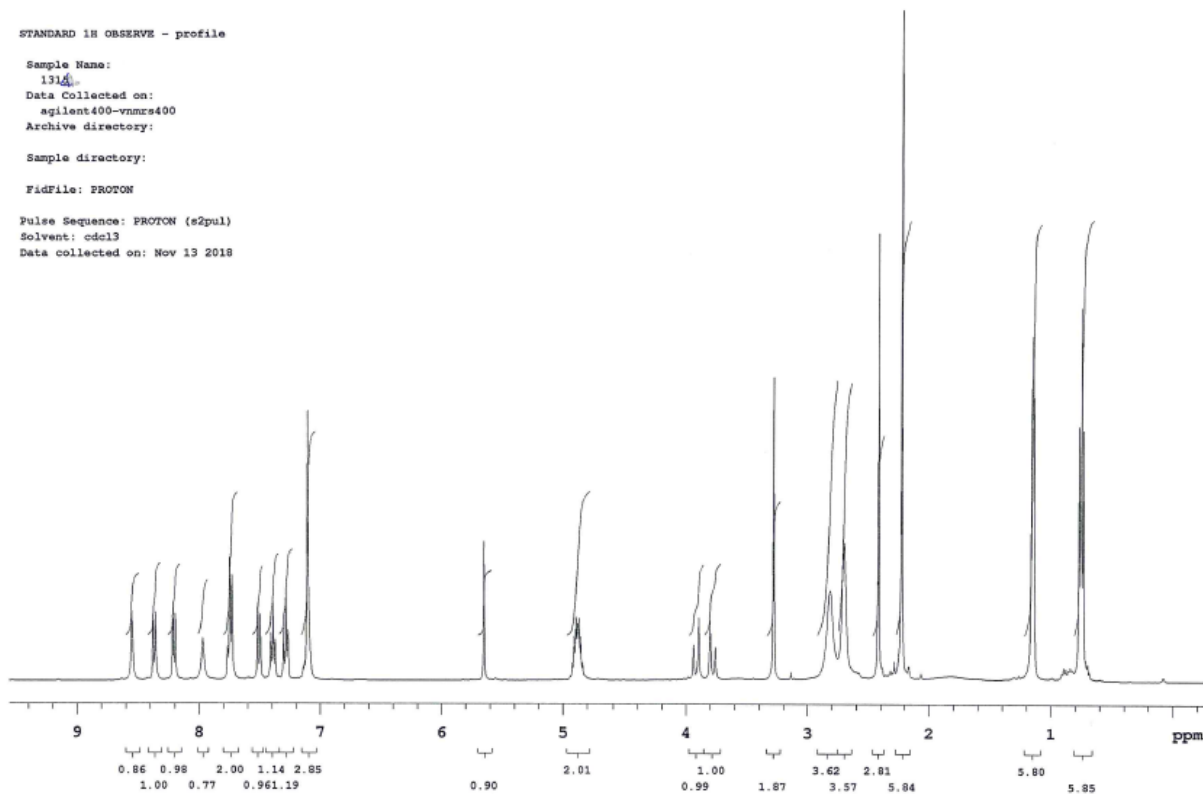

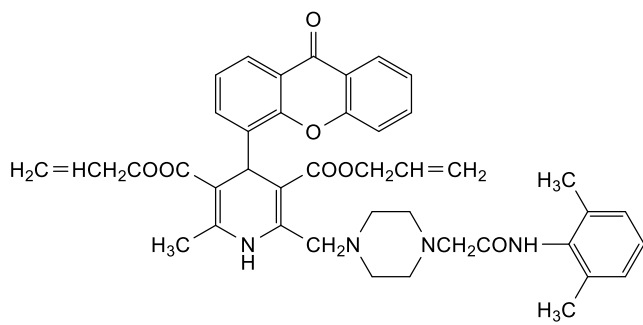

4d

STANDARD 1H OBSERVE - profile

Sample Name: ep\_3077  
 Data Collected on: agilent400-vnmrs400  
 Archive directory:  
 Sample directory:  
 FidFile: PROTON  
 Pulse Sequence: PROTON (s2pul)  
 Solvent: cdcl3  
 Data collected on: Jan 23 2016

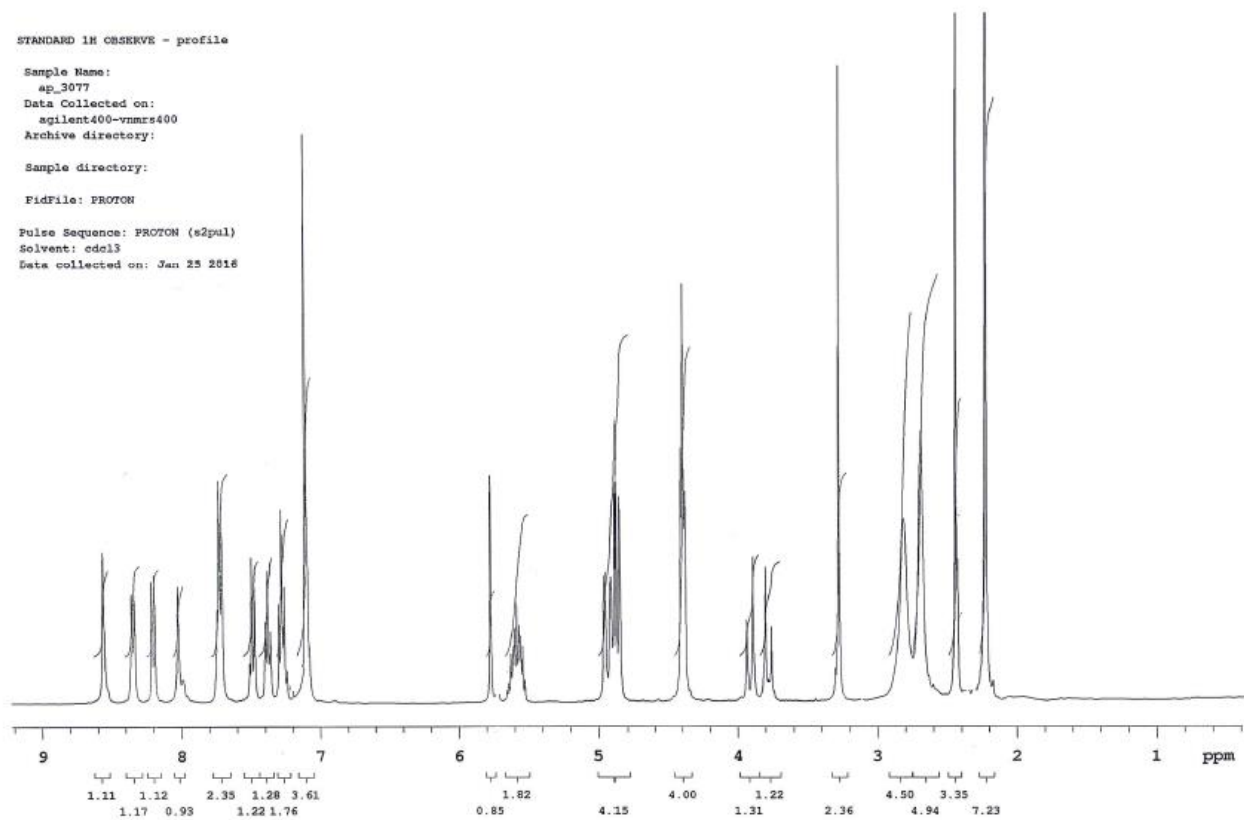

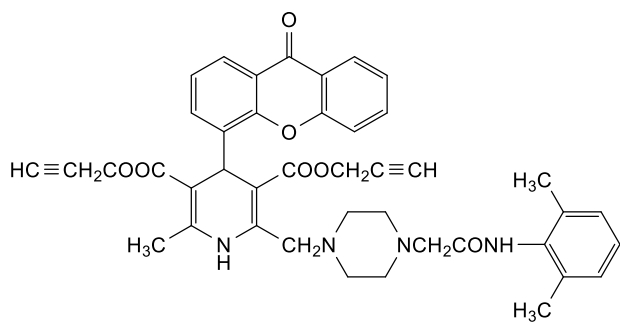

4e

STANDARD 1H OBSERVE - profile

Sample Name: propargile  
 Data Collected on: agilent400-vnmrs400  
 Archive directory:  
 Sample directory:  
 FidFile: PROTON  
 Pulse Sequence: PROTON (s2pul)  
 Solvent: cdcl3  
 Data collected on: May 31 2017

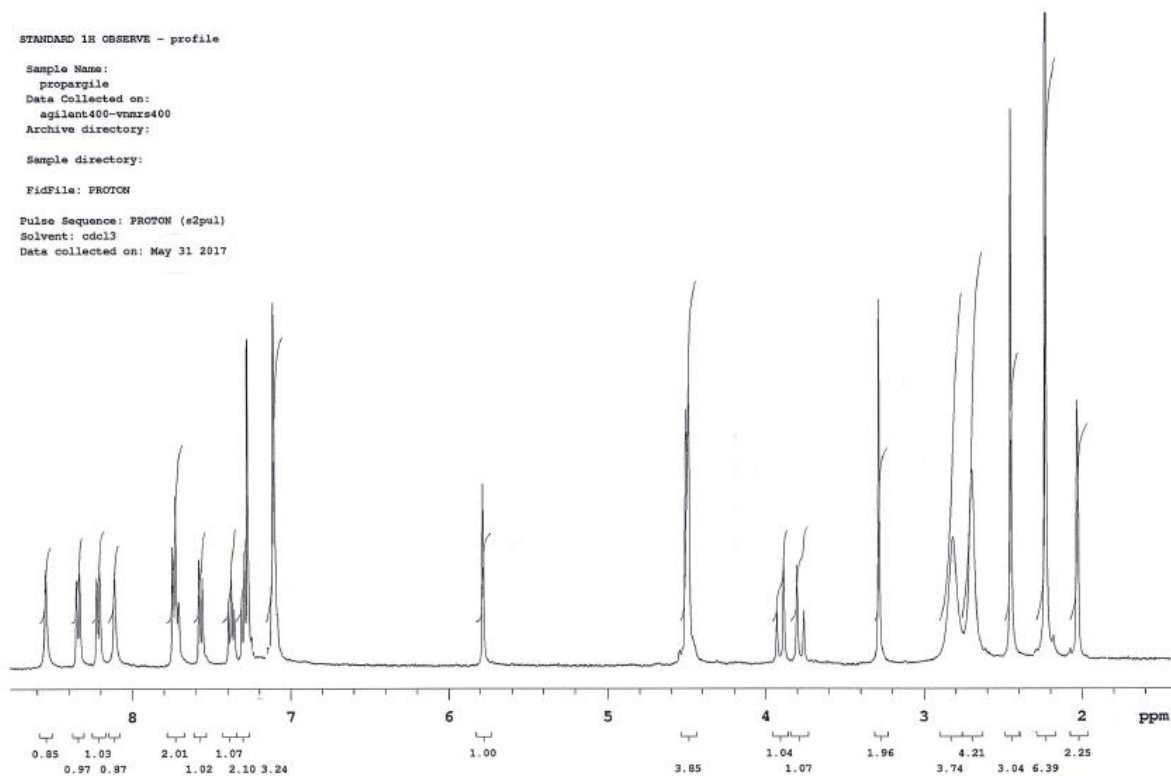

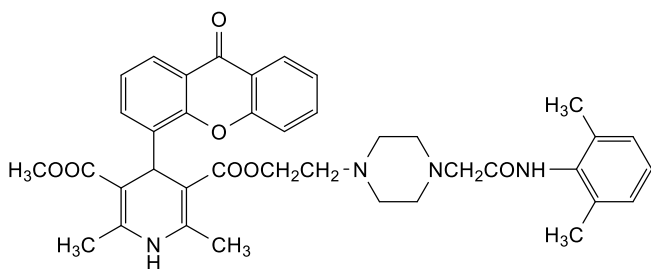

5a

STANDARD 1H OBSERVE - profile

Sample Name:  
 ap\_1351  
 Data Collected on:  
 agilent400-vnmrs400  
 Archive directory:  
 Sample directory:  
 Fidfile: PROTON  
 Pulse Sequence: PROTON (s2pul)  
 Solvent: cdcl3  
 Data collected on: Jan 28 2016

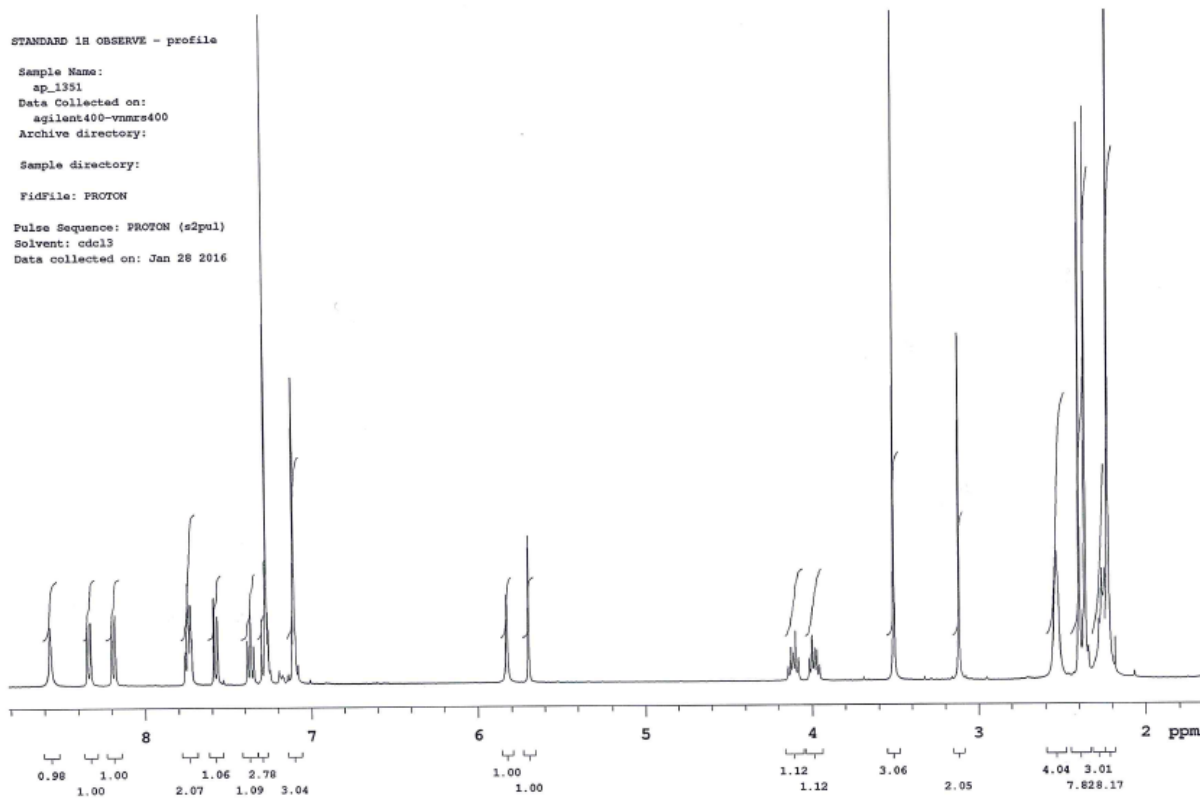



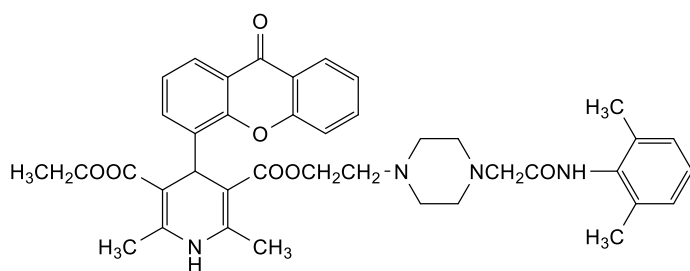

**5b**

PC147 LM

Sample Name:

Data Collected on:  
agilent400-vnmrs400

Archive directory:

Sample directory:

FidFile: PROTON

Pulse Sequence: PROTON (s2pul)  
Solvent: cdcl3  
Data collected on: Nov 20 2018

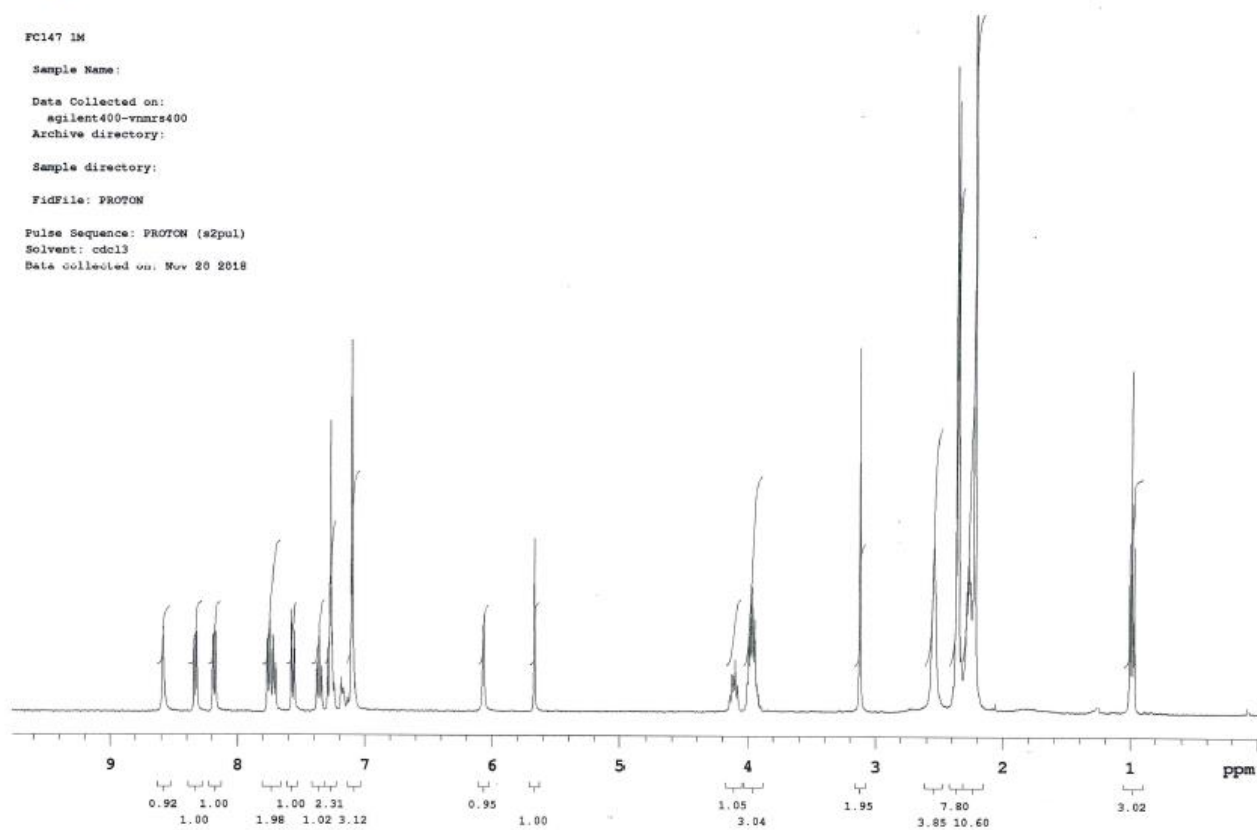

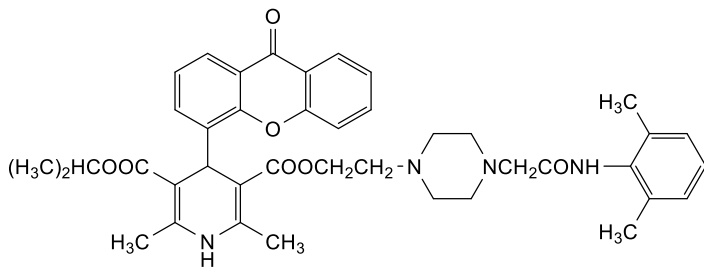

5c

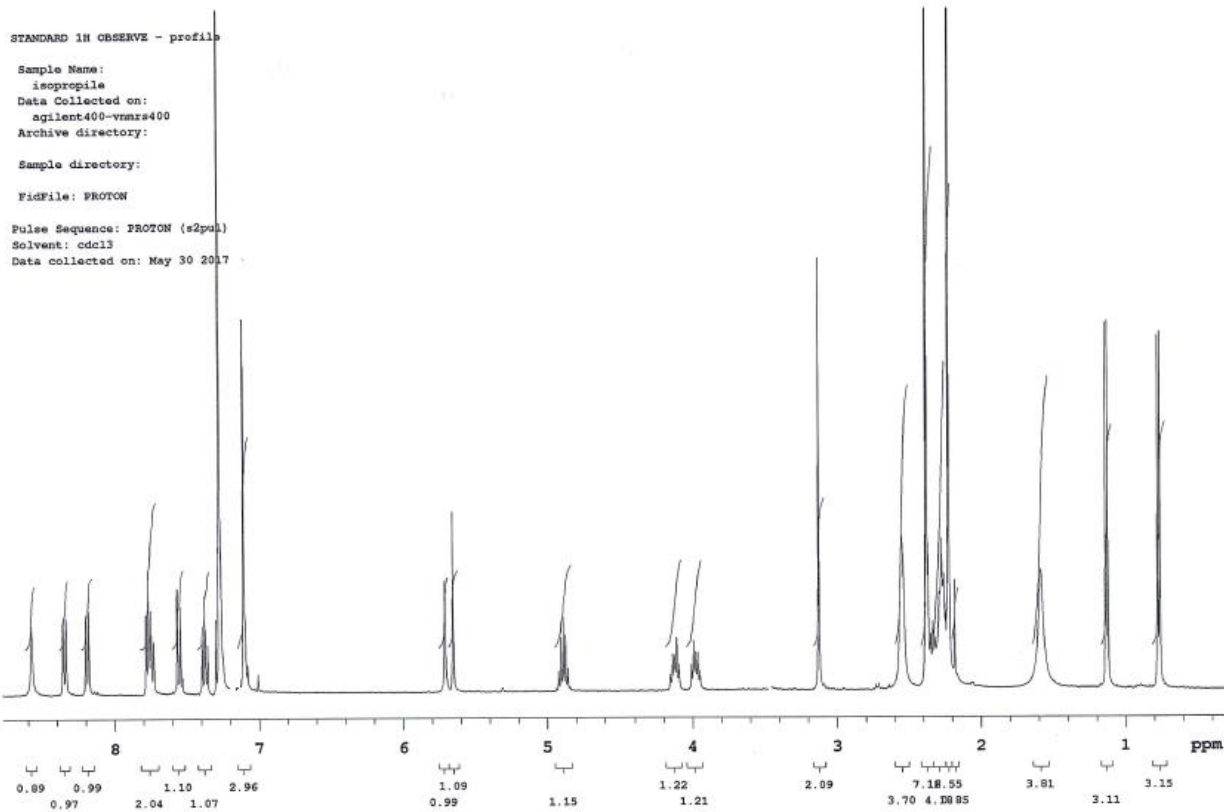

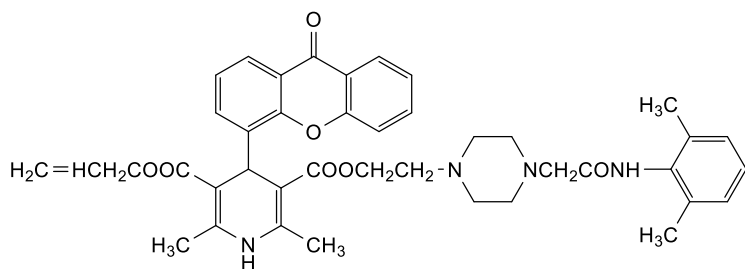

5d

STANDARD 1H OBSERVE - profile

Sample Name:  
ap\_1504  
Data Collected on:  
agilent400-vnmrs400  
Archive directory:  
Sample directory:  
Fidfile: PROTON  
Pulse Sequence: PROTON (s2pul)  
Solvent: cdcl3  
Data collected on: Jan 28 2016

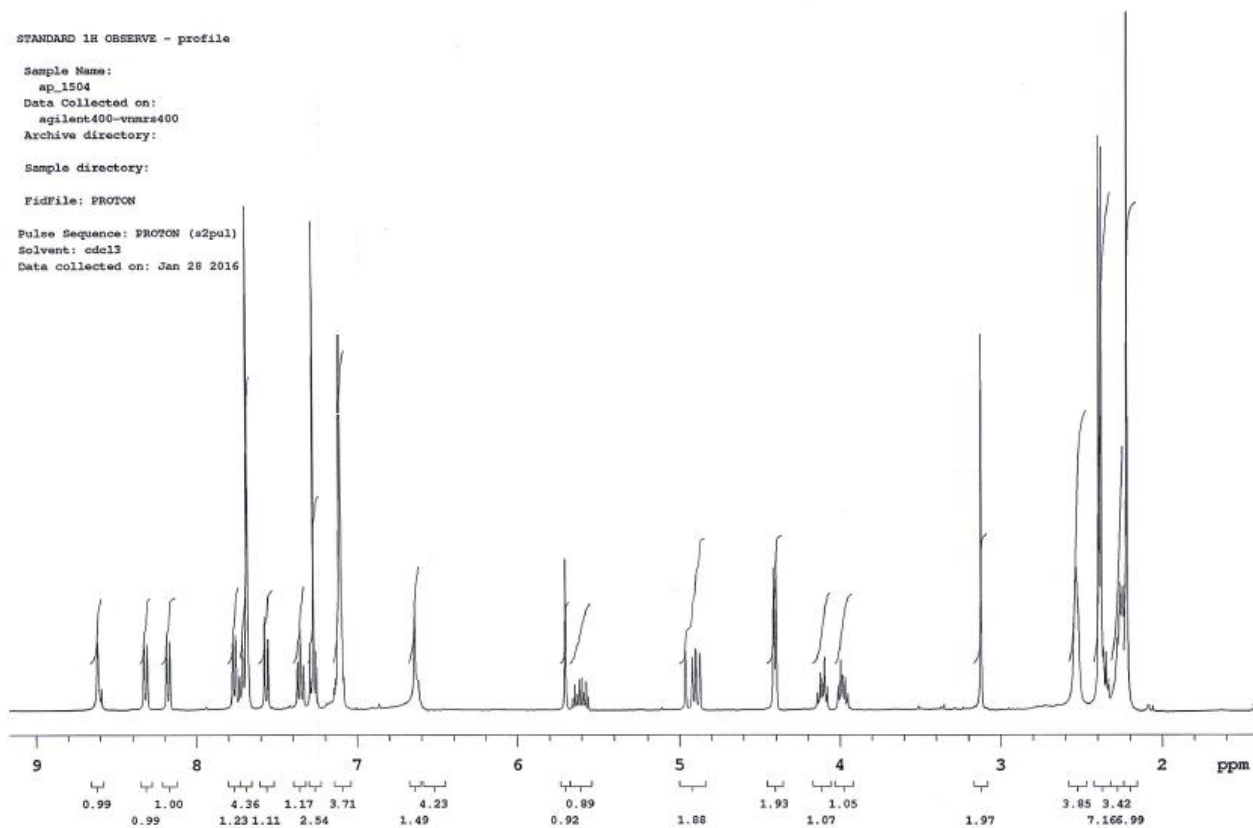



4a

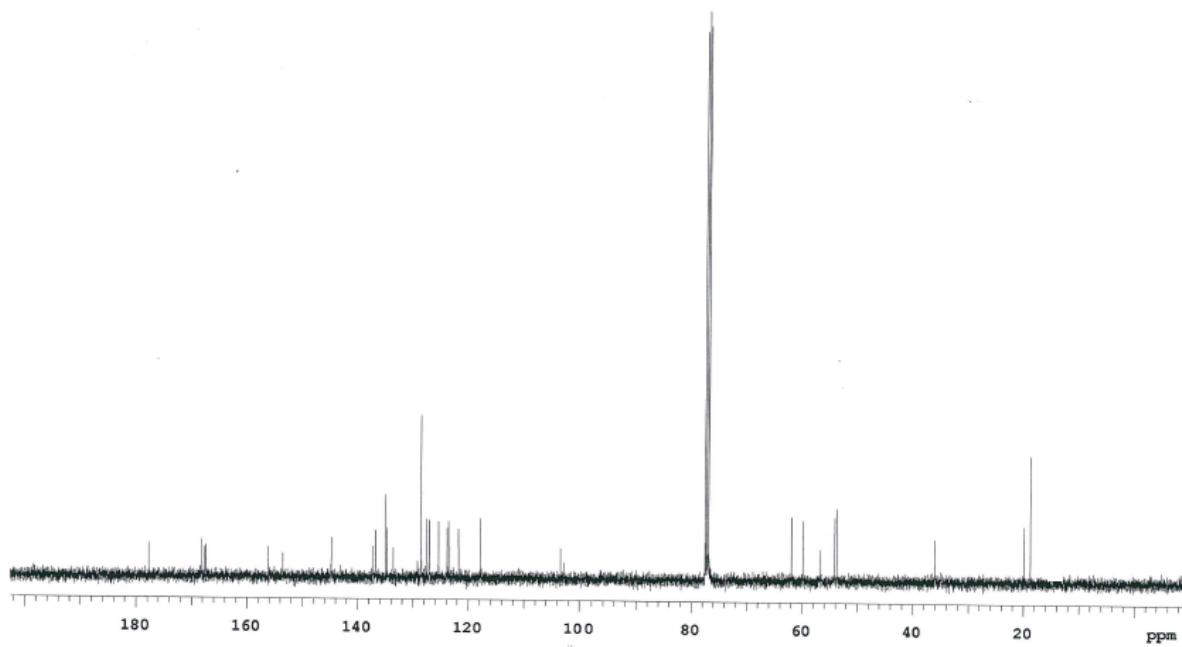

4b

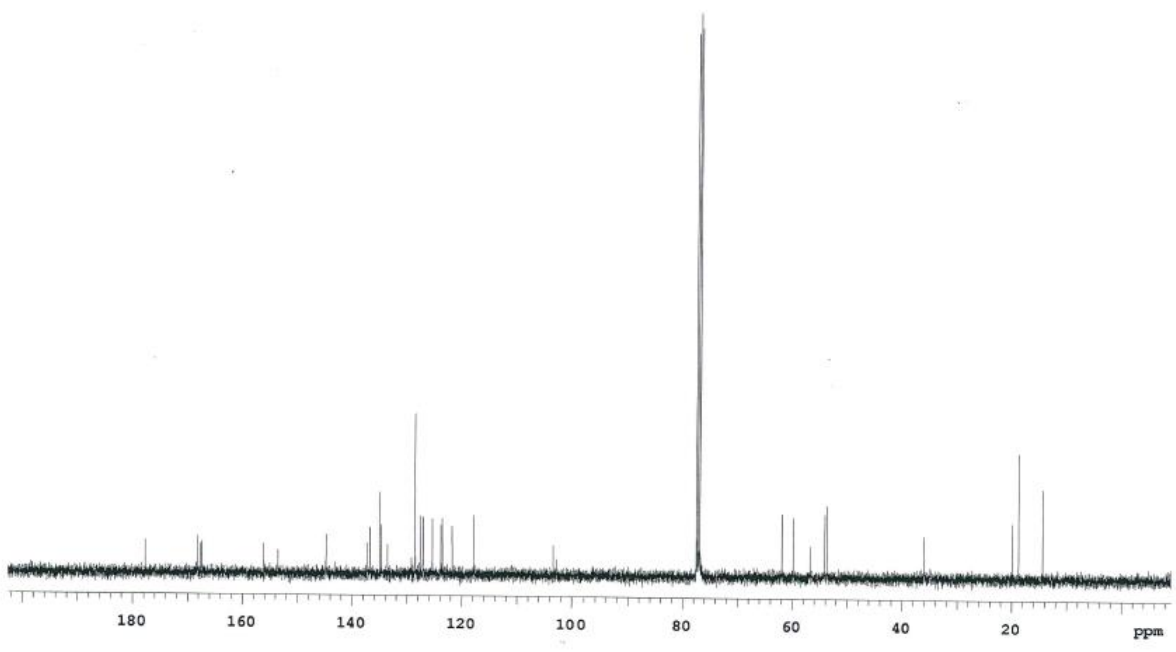

4c

STANDARD IN OBSERVE - profile

Sample Name:  
131A  
Data Collected on:  
agilent400-vnmrs400  
Archive directory:  
Sample directory:  
FidFile: CARBON  
Pulse Sequence: CARBON (s2pul)  
Solvent: cdcl3  
Data collected on: Nov 13 2018

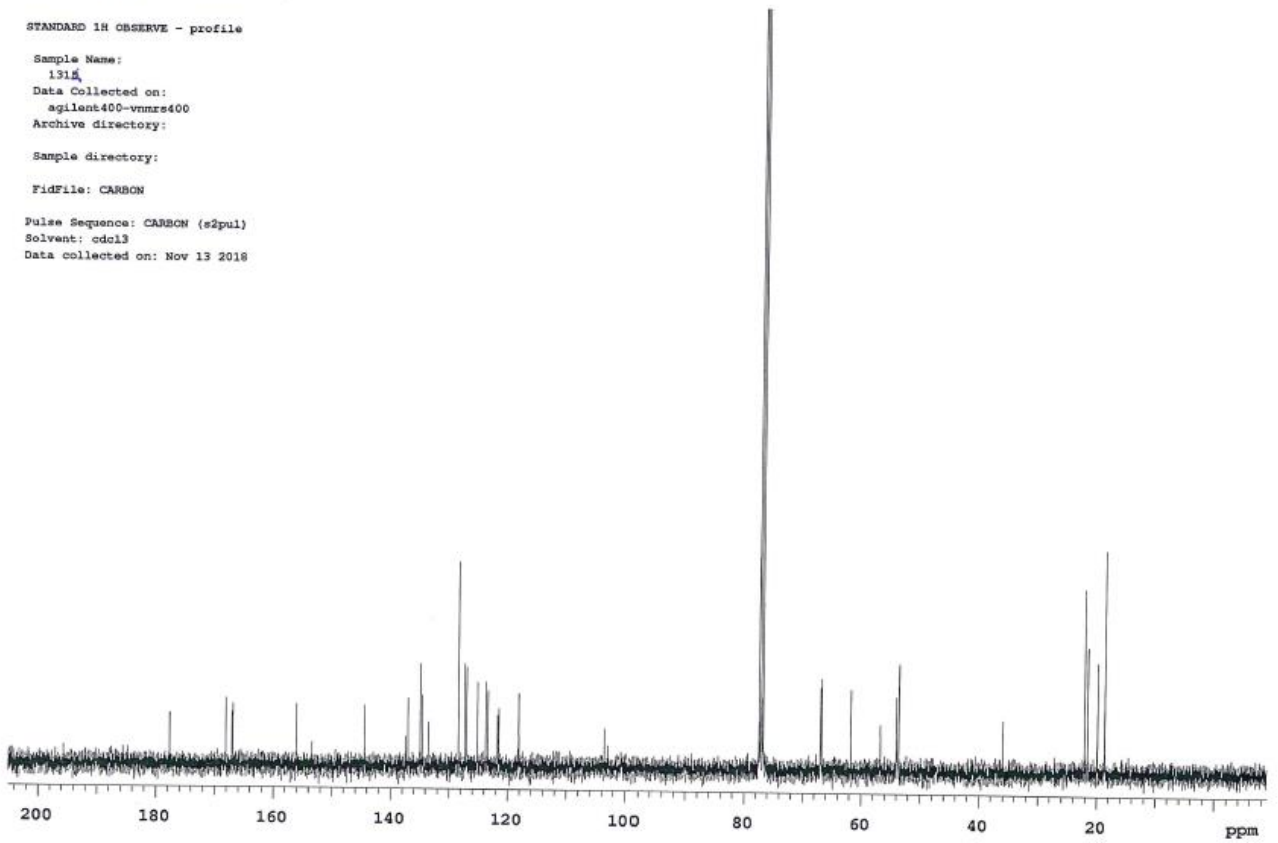

4d

STANDARD 1H OBSERVE - profile

Sample Name:  
ap\_3077  
Data Collected on:  
agilent400-vnmrs400  
Archive directory:  
Sample directory:  
FidFile: CARBON  
Pulse Sequence: CARBON (s2pul)  
Solvent: cdcl3  
Data collected on: Jan 25 2016

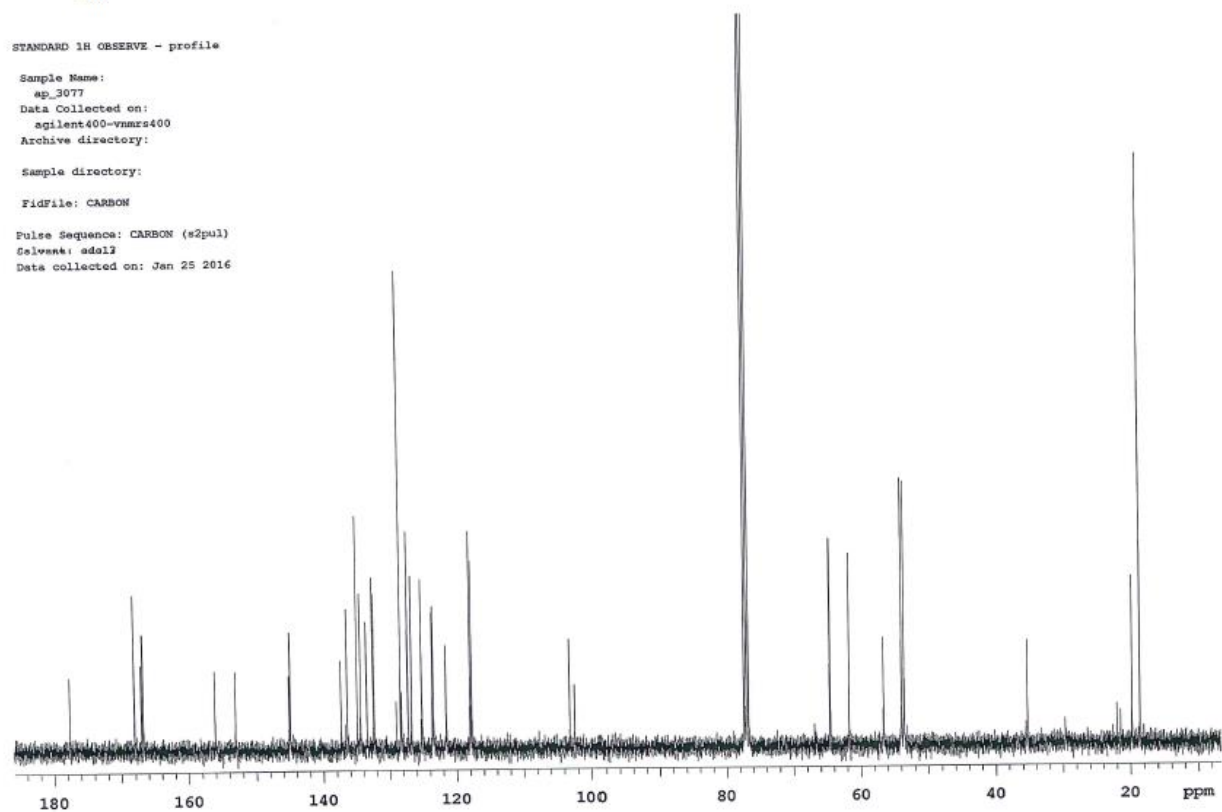



4e

STANDARD 1H OBSERVE - profile

Sample Name:  
propargile  
Data Collected on:  
agilent400-vnmrs400  
Archive directory:

Sample directory:

FidFile: CARBON

Pulse Sequence: CARBON (s2pal)  
Solvent: cdcl3  
Data collected on: May 31 2017

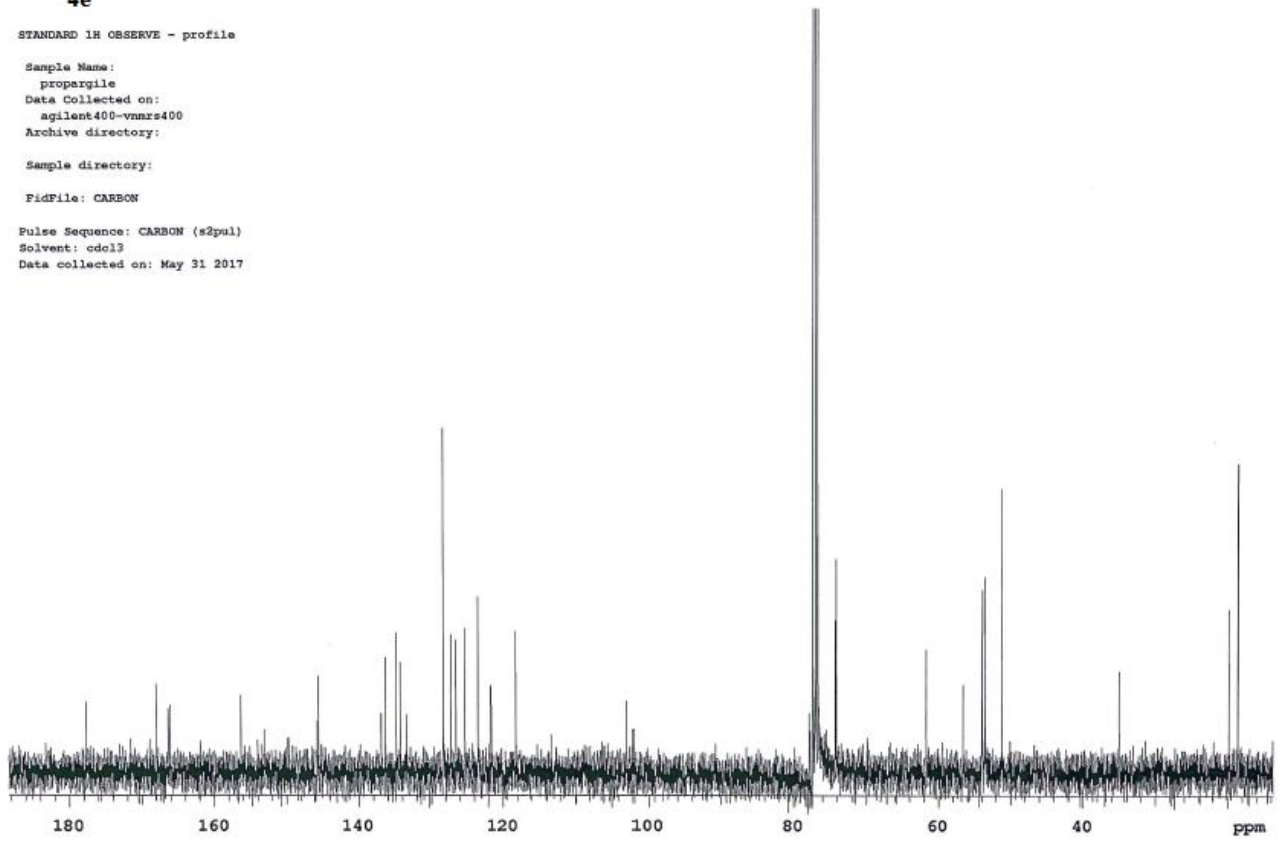

5a

STANDARD 1H OBSERVE - profile

Sample Name:  
ap\_1351  
Data Collected on:  
agilent400-vnmrs400  
Archive directory:  
Sample directory:  
Fidfile: CARBON  
Pulse Sequence: CARBON (s2pul)  
Solvent: cdcl3  
Data collected on: Feb 1 2016

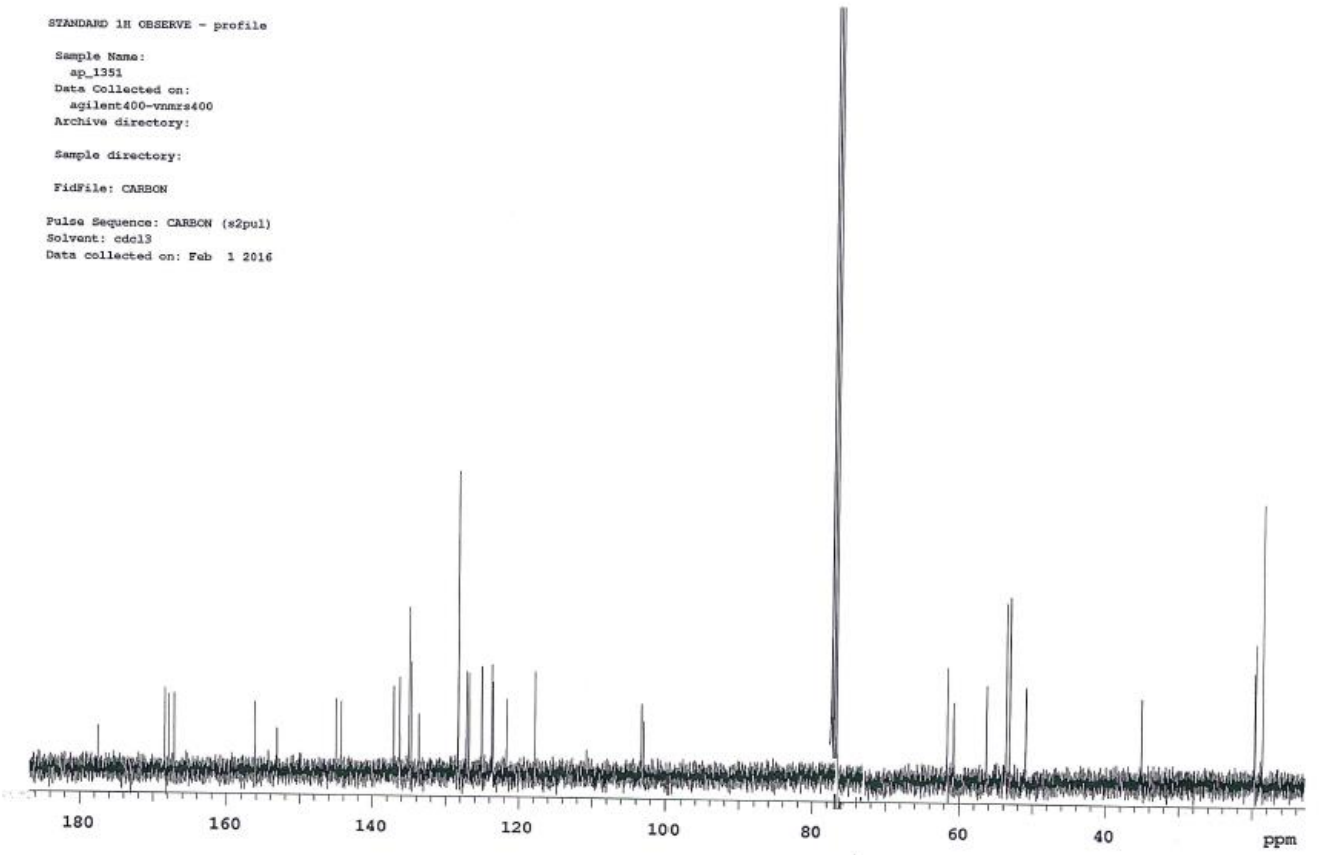

**5b**

FC147 1M

Sample Name:  
1347  
Data Collected on:  
agilent400-vnmrs400  
Archive directory:

Sample directory:

FidFile: CARBON

Pulse Sequence: CARBON (s2pul)  
Solvent: cdcl3  
Data collected on: Nov 20 2018

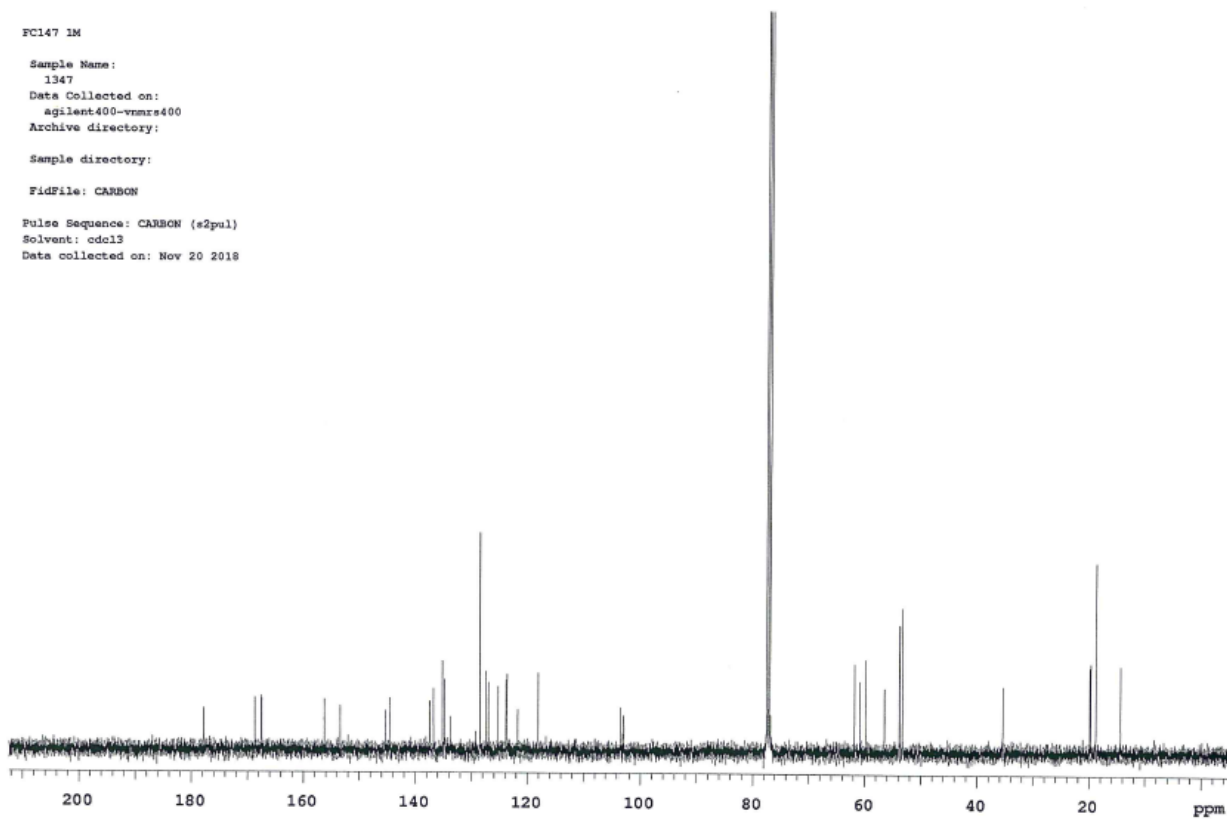

5c

FC147 1M

Sample Name:

Data Collected on:  
agilent400-vnmr400

Archive directory:

Sample directory:

FidFile: CARBON

Pulse Sequence: CARBON (s2pul)

Solvent: cdcl3

Date collected on: Nov 20 2018

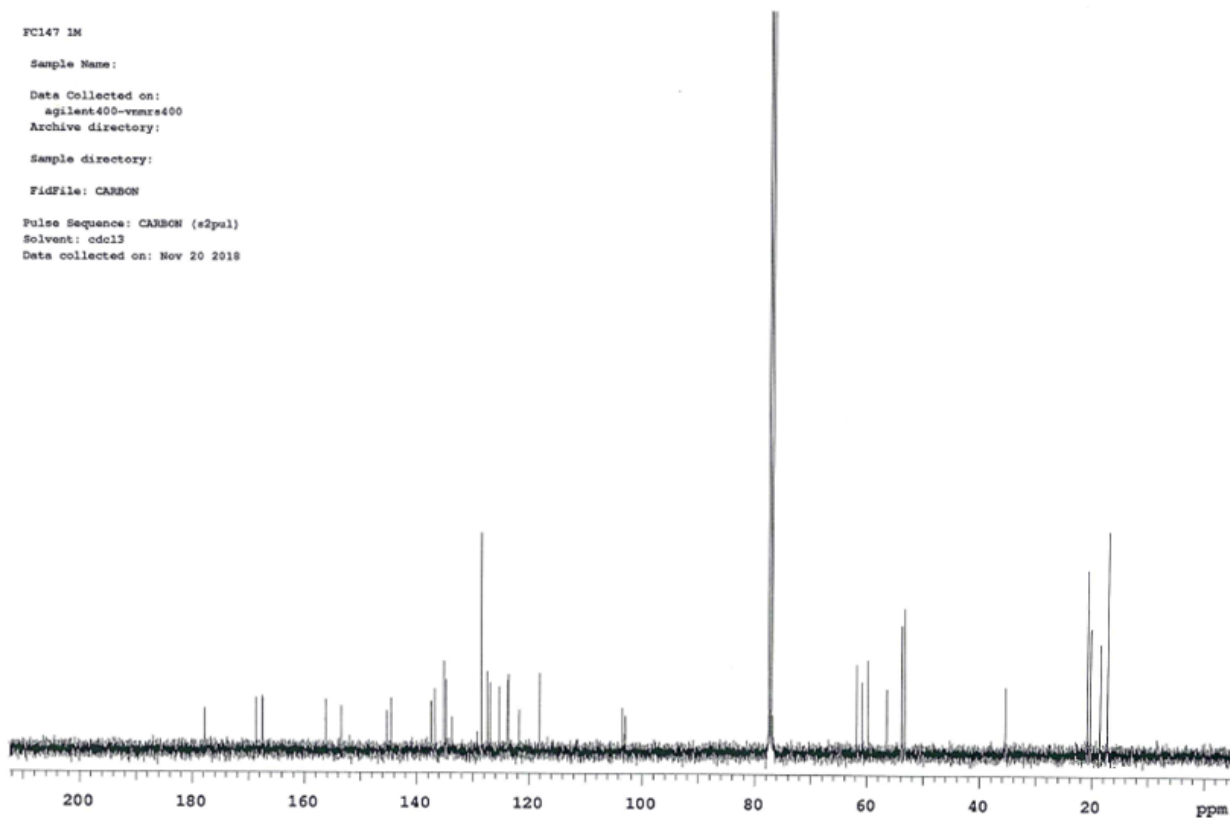

5d

STANDARD 1H OBSERVE - profile

Sample Name:  
sp\_1504  
Data Collected on:  
agilent400-nmr400  
Archive directory:  
Sample directory:  
FidFile: CARBON  
Pulse Sequence: CARBON (s2pul)  
Solvent: cdcl3  
Data collected on: Feb 1 2016

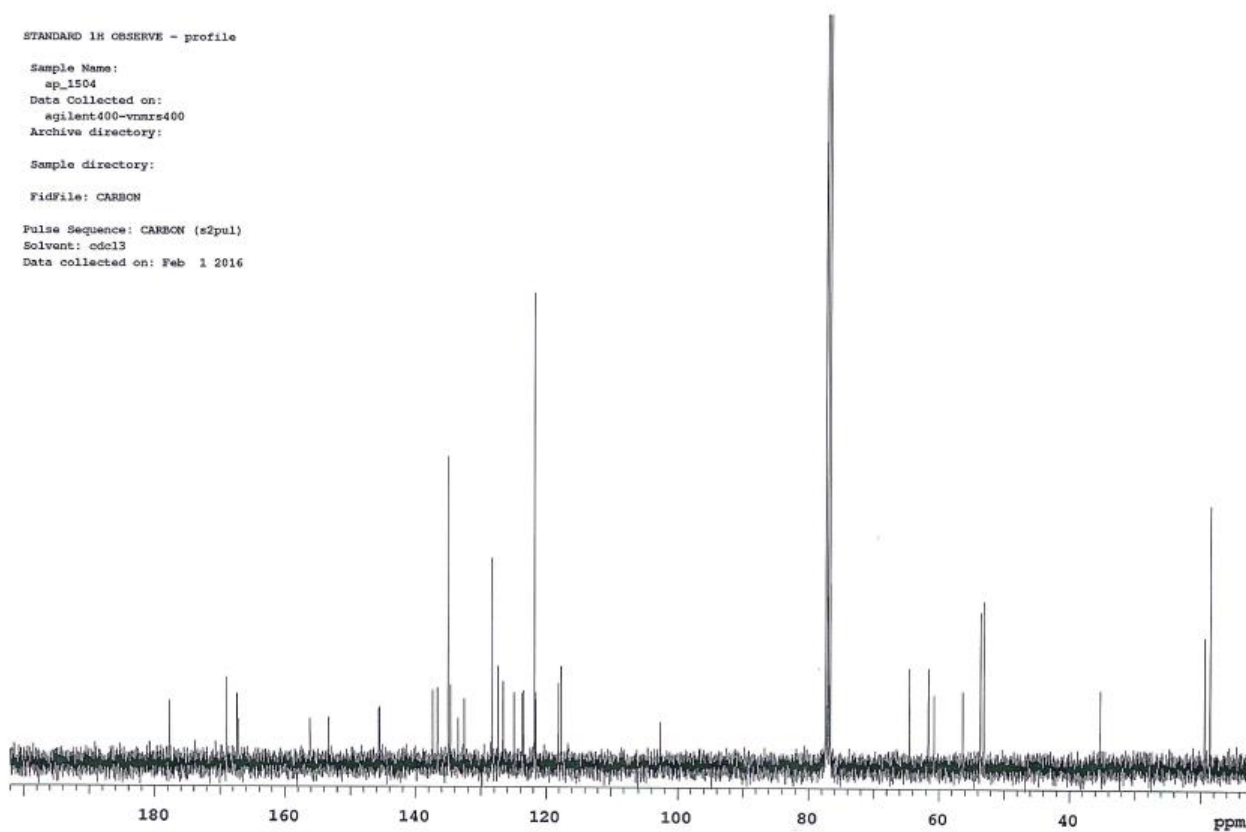

5e

STANDARD IN OBSERVE - profile

Sample Name:

Data Collected on:  
agilent400-vnmr400

Archive directory:

Sample directory:

FidFile: CARBON

Pulse Sequence: CARBON (s2pul)

Solvent: cdcl3

Data collected on: Nov 13 2018

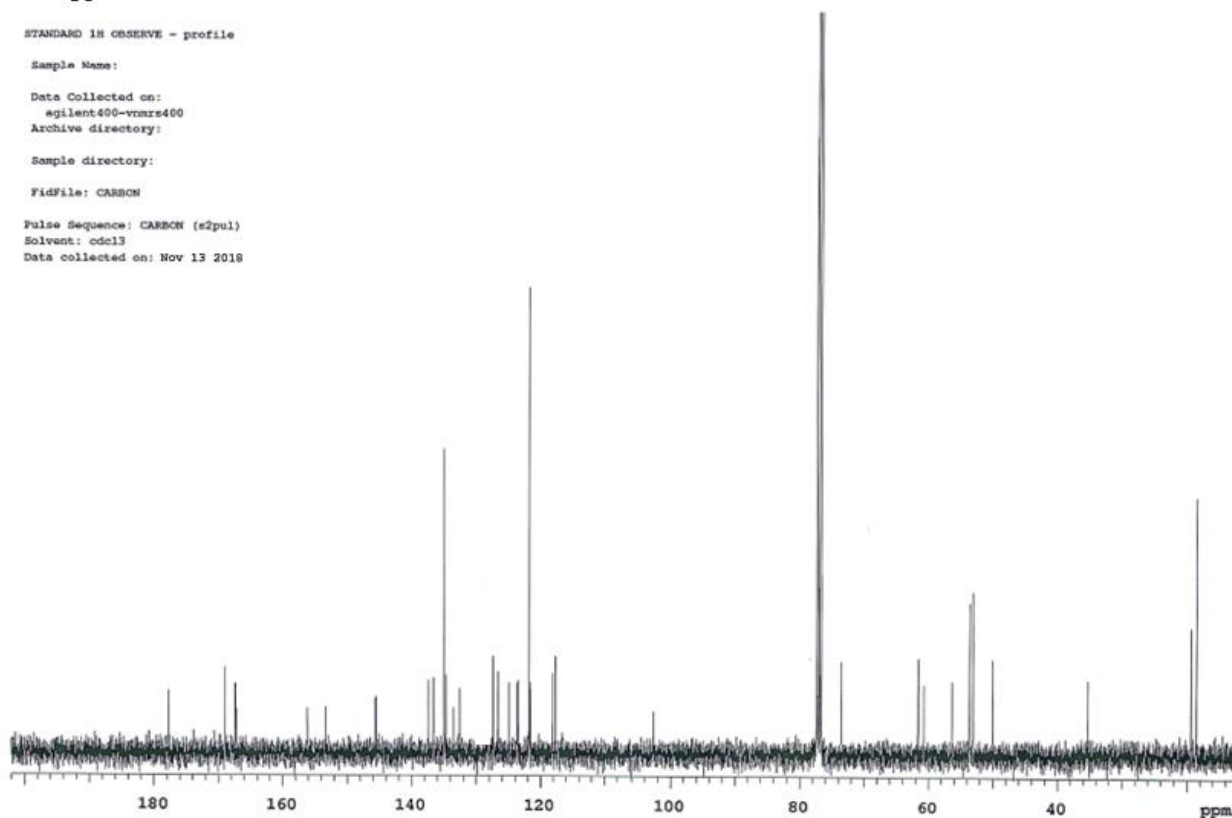

## References

1. Chiarini A, Rampa A, Budriesi R, Bisi A, Fabbri G, Valenti P. 1,4-Dihydropyridines bearing a pharmacophoric fragment of lidoflazine. *Bioorg Med Chem.* 1996; 10:1629-1635.
2. Valenti P, Chiarini A, Gasperi F, Budriesi R. Xanthone 1,4-dihydropyridine derivatives with a potent selective bradycardic effect. *Arzneimittelforschung.* 1990; 40:122-125.
3. Chiarini A, Rampa A, Bisi A, Budriesi R, Valenti P. Negative inotropic and chronotropic activity of calcium channel ligands possessing a xanthone 1,4-dihydropyridine backbone. *Arzneimittelforschung.* 1992; 42:797-801.
